# Supplementary material
Source: publisher figshare collection journal article supplement (https://tandf.figshare.com/ndownloader/files/22024569)
Supplement: Supplementary file 1 [file 22024569]

**Appendix 1.** Descriptive statistics of variables included in analyses.

| Variable | Description | N | Mean | Std. Dev. | Min | Max |
| --- | --- | --- | --- | --- | --- | --- |
| Voting Irregularities | The level of voting irregularities reported in the election. “In this national election, was there evidence of *intentional* irregularities by incumbent and/or opposition parties, and/or vote fraud?” Source: V-Dem. | 109 | 2.43 | 1 | 0.12 | 4.43 |
| Ex ante closeness | 100 - margin between 1st and 2nd placed candidates in pre-election poll. | 109 | 87.15 | 9.36 | 55.4 | 100 |
| Incumbent Margin | Absolute marginal lead/trail of the incumbent. Negative scores indicate a deficit, positive scores indicate a lead. | 109 | 1.55 | 16.57 | -35.1 | 44.6 |
| Democracy Level (FH) | Freedom House status, Not Free category omitted: Free (1), Partly Free (0). | 109 | 0.61 | 0.49 | 0 | 1 |
| Political Rights (FH) | Freedom House Political Rights raw score, restructured and autocracies omitted, ranging from 1 (least democratic) to 5 (most democratic). | 109 | 3.78 | 1.18 | 1 | 5 |
| Incumbent Lead | Dummy variable indicating whether the incumbent party or candidate is leading in the pre-election poll. | 109 | 0.51 | 0.5 | 0 | 1 |
| Voting Irregularities (lag) | The level of voting irregularities reported in the previous presidential election. | 109 | 2.44 | 1 | 0.22 | 5.2 |
| Domestic Observers | Dummy variable indicating the presence of at least one domestic election observation mission in the election. | 109 | 0.94 | 0.23 | 0 | 1 |
| International Observers | Dummy variable indicating the presence of at least one international election observation mission in the election. | 109 | 0.77 | 0.42 | 0 | 1 |
| Media Bias | v2mebias “Is there media bias against opposition parties or candidates?” Reversed from the raw variable, so that higher scores indicate more media bias. Source: V-Dem. | 109 | -1.42 | 0.72 | -3.75 | 0.22 |
| Corruption | v2x_corr “How pervasive is political corruption?” Higher values indicate more corruption. Source: V-Dem. | 109 | 0.5 | 0.26 | 0.03 | 0.9 |
| GDP(log) | A logged form of the national GDP. Source: World Bank. | 109 | 9.16 | 0.94 | 6.87 | 10.88 |
| Poll Proximity | The number of days between the poll and the election. | 109 | 93.91 | 92.91 | 9 | 346 |
| Presidential Power | V2exdfpphs “Does the head of state have the capacity, in practice, to propose legislation?” Interval variable, reversed from original coding so that higher figures indicate more powerful heads of state. | 109 | -0.15 | 1.1 | -2.92 | 1.27 |

**Appendix 2.**Descriptive statistics of pre-election poll margins, broken down by Freedom House Level.

|  | Free | Partly Free | Overall |
| --- | --- | --- | --- |
| Mean | 12.25 | 13.76 | 12.85 |
| St. Deviation | 9.14 | 9.74 | 9.36 |
| Min | 0 | 1 | 0 |
| Max | 39 | 44.6 | 44.6 |
| Observations | 66 | 43 | 109 |

|  | Free | Partly Free | Overall |
| --- | --- | --- | --- |
| Mean | 1.35 | 1.86 | 1.55 |
| St. Deviation | 16.09 | 17.47 | 16.57 |
| Min | -35.1 | -32 | -35.1 |
| Max | 39 | 44.6 | 44.6 |
| Observations | 66 | 43 | 109 |

**Appendix 3.** Descriptive statistics of Incumbent Margin, broken down by Freedom House category.

**Appendix 4.** Descriptive statistics of ex ante closeness (inverse absolute poll margin), broken down by Freedom House category.

|  | Free | Partly Free | Overall |
| --- | --- | --- | --- |
| Mean | 87.75 | 86.24 | 87.15 |
| St. Deviation | 9.14 | 9.74 | 9.36 |
| Min | 61 | 55.4 | 55.4 |
| Max | 100 | 99 | 100 |
| Observations | 66 | 43 | 109 |

**Appendix 5.** Summary of pre-election polls coverage in the sample, broken down by region.

|  | Presidential Elections 1996-2016 | | | | |
| --- | --- | --- | --- | --- | --- |
| Region | **No Polls** | **Polls** | **Total** | **Coverage %** | **Sample %** |
| Sub-Saharan Africa | 97 | 16 | 113 | 14.16 | 13.01 |
| MENA | 6 | 2 | 8 | 25.00 | 1.63 |
| Central Asia | 7 | 0 | 7 | 0.00 | 0 |
| East Asia | 6 | 4 | 10 | 40.00 | 3.25 |
| South Asia | 15 | 4 | 19 | 21.05 | 3.25 |
| Eastern Europe | 55 | 20 | 75 | 26.67 | 16.26 |
| W Europe and N America | 14 | 15 | 29 | 51.72 | 12.20 |
| Central America | 9 | 31 | 40 | 77.5 | 25.20 |
| South America | 19 | 31 | 50 | 62.00 | 25.20 |
| Total | **228** | **123** | **351** | **35.61** | **100** |

**Appendix 6.** Robustness test: poll proximity. Replication of Models 3 and 6 in Table 2 first controlling for poll proximity (a), then limiting the sample to include polls collected at intervals closer to the election (b-d).

|  | DV: Election Day Irregularities. Polls conducted up to [# days] prior to the election | | | | | | | |
| --- | --- | --- | --- | --- | --- | --- | --- | --- |
|  | (3a) | (3b)  180 days | (3c)  90 days | (3d)  45 days | (6a) | (6b)  180 days | (6c)  90 days | (6d)  45 days |
| Ex Ante Closeness | .017 | .019 | .022 | .025 |  |  |  |  |
|  | (.008)** | (.008)** | (.008)*** | (.006)*** |  |  |  |  |
| Incumbent Margin |  |  |  |  | .043 | .048 | .04 | .042 |
|  |  |  |  |  | (.012)*** | (.014)*** | (.012)*** | (.016)** |
| Incumbent Margin2 |  |  |  |  | -.0004 | -.0004 | -.0004 | -.0004 |
|  |  |  |  |  | (.0001)*** | (.0001)*** | (.0001)*** | (.0001)** |
| *Interactions* |  |  |  |  |  |  |  |  |
| Closeness*FH Level | -.009 | -.008 | -.016 | -.018 |  |  |  |  |
|  | (.009) | (.01) | (.008)* | (.006)*** |  |  |  |  |
| *Controls* |  |  |  |  |  |  |  |  |
| Poll Proximity | .0002 |  |  |  | .0003 |  |  |  |
|  | (.0004) |  |  |  | (.0004) |  |  |  |
| FH Level | .514 | .324 | 1.202 | 1.337 | -.327 | -.373 | -.232 | -.193 |
|  | (.856) | (.882) | (.73) | (.538)** | (.122)*** | (.13)*** | (.142) | (.141) |
| Voting Irregularities(t-1) | .409 | .361 | .524 | .704 | .402 | .359 | .535 | .72 |
|  | (.144)*** | (.15)** | (.127)*** | (.108)*** | (.142)*** | (.149)** | (.142)*** | (.117)*** |
| GDP | .029 | -.08 | -.158 | -.178 | .032 | -.073 | -.171 | -.228 |
|  | (.088) | (.098) | (.122) | (.129) | (.083) | (.092) | (.12) | (.137)* |
| Presidential Power | .01 | -.033 | .089 | .063 | -.008 | -.046 | .065 | .039 |
|  | (.06) | (.057) | (.064) | (.048) | (.055) | (.052) | (.6) | (.052) |
| Domestic Observers | -.059 | -.231 | -.07 | .329 | -.083 | -.273 | -.152 | .06 |
|  | (.261) | (.371) | (.385) | (.173)* | (.261) | (.381) | (.421) | (.218) |
| International Observers | .119 | .085 | .011 | -.068 | .137 | .122 | -.005 | -.08 |
|  | (.099) | (.105) | (.112) | (.135) | (.103) | (.115) | (.129) | (.15) |
| Media Bias | .156 | .138 | .171 | .184 | .141 | .116 | .139 | .177 |
|  | (.061)** | (.075)* | (.08)** | (.078)** | (.063)** | (.074) | (.078)* | (.073)** |
| Corruption | 1.065 | 1.259 | 1.036 | .548 | 1.098 | 1.306 | 1.069 | .429 |
|  | (.402)*** | (.453)*** | (.439)** | (.475) | (.387)*** | (.43)*** | (.478)** | (.514) |
| Region Dummies | Y | Y | Y | Y | Y | Y | Y | Y |
|  |  |  |  |  |  |  |  |  |
| Constant | -.539 | .539 | .513 | .009 | -.113 | .978 | 1.582 | 1.841 |
|  | (1.259) | (1.285) | (1.352) | (1.427) | (1.129) | (1.19) | (1.377) | (1.494) |
| R2 | .87 | .887 | .922 | .95 | .874 | .889 | .917 | .946 |
| N |  |  |  |  |  |  |  |  |
| (elections) | 107 | 90 | 71 | 57 | 107 | 90 | 71 | 57 |
| (countries) | 49 | 46 | 40 | 33 | 49 | 46 | 40 | 33 |

*Notes*: Robust standard errors, clustered by country in parentheses. Positive coefficients indicate more voting irregularities. *p<0.1, **p<0.05, ***p<0.01

**Appendix 7.** Robustness test. Replication of Models 2, 3, 5, and 6 in Table 2 using a continuous measure of democracy.

|  | DV: Election Day Irregularities. | | | |
| --- | --- | --- | --- | --- |
|  | (2) | (3) | (5) | (6) |
| Ex Ante Closeness | .01 | .026 | .007 |  |
|  | (.004)** | (.02) | (.007) |  |
| Incumbent Margin |  |  |  | .035 |
|  |  |  |  | (.012)*** |
| Incumbent Margin-sq |  |  |  | -.0003 |
|  |  |  |  | (.0001)*** |
| Incumbent Lead (0,1) |  |  | -.668 |  |
|  |  |  | (.854) |  |
| *Interactions* |  |  |  |  |
| Closeness*Political Rights |  | -.004 |  |  |
|  |  | (.005) |  |  |
| Closeness*Inc Lead |  |  | .009 |  |
|  |  |  | (.01) |  |
| *Controls* |  |  |  |  |
| Political Rights | -.173 | .18 | -.169 | -.165 |
|  | (.058)*** | (.427) | (.053)*** | (.057)*** |
| Voting Irregularities(t-1) | .387 | .396 | .385 | .392 |
|  | (.138)*** | (.142)*** | (.139)*** | (.142)*** |
| GDP(log) | .004 | .01 | .006 | .003 |
|  | (.085) | (.085) | (.084) | (.082) |
| Presidential Power | .036 | .046 | .032 | .029 |
|  | (.054) | (.057) | (.051) | (.052) |
| Domestic Observers | -.017 | .01 | -.066 | -.031 |
|  | (.274) | (.269) | (.256) | (.27) |
| International Observers | .114 | .133 | .132 | .14 |
|  | (.092) | (.092) | (.086) | (.092) |
| Media Bias | .166 | .168 | .154 | .159 |
|  | (.056)*** | (.059)*** | (.06)** | (.059)*** |
| Corruption | .798 | .792 | .773 | .82 |
|  | (.363)** | (.367)** | (.362)** | (.359)** |
| Region Dummies | Y | Y | Y | Y |
|  |  |  |  |  |
| Constant | .769 | -.607 | 1.16 | .889 |
|  | (1.275) | (2.034) | (1.291) | (1.135) |
| R-sq | .874 | .875 | .879 | .876 |
| N |  |  |  |  |
| (elections) | 109 | 109 | 109 | 109 |
| (countries) | 50 | 50 | 50 | 50 |

*Notes*: Robust standard errors, clustered by country in parentheses. Positive coefficients indicate more voting irregularities. *p<0.1, **p<0.05, ***p<0.01

**Appendix 8.** Robustness test. Replication of Models 2, 3, 5, and 6 in Table 2 with the inclusion of year-dummy variables.

|  | DV: Election Day Irregularities. | | | |
| --- | --- | --- | --- | --- |
|  | (2) | (3) | (5) | (6) |
| Ex Ante Closeness | .011 | .018 | .005 |  |
|  | (.006)* | (.008)** | (.008) |  |
| Incumbent Margin |  |  |  | .046 |
|  |  |  |  | (.014)*** |
| Incumbent Margin-sq |  |  |  | -.0003 |
|  |  |  |  | (.0001)*** |
| Incumbent Lead (0,1) |  |  | -1.11 |  |
|  |  |  | (.899) |  |
| *Interactions* |  |  |  |  |
| Closeness*Political Rights |  | -.012 |  |  |
|  |  | (.009) |  |  |
| Closeness*Inc Lead |  |  | .015 |  |
|  |  |  | (.01) |  |
| *Controls* |  |  |  |  |
| Democracy Level | -.265 | .789 | -.324 | -.294 |
|  | (.148)* | (.867) | (.124)** | (.135)** |
| Voting Irregularities(t-1) | .44 | .443 | .402 | .432 |
|  | (.137)*** | (.138)*** | (.136)*** | (.138)*** |
| GDP(log) | .019 | .008 | .044 | .033 |
|  | (.102) | (.103) | (.102) | (.099) |
| Presidential Power | 0 | .009 | -.009 | -.012 |
|  | (.06) | (.062) | (.055) | (.058) |
| Domestic Observers | -.203 | -.173 | -.288 | -.221 |
|  | (.292) | (.29) | (.254) | (.283) |
| International Observers | .114 | .142 | .122 | .152 |
|  | (.111) | (.113) | (.109) | (.109) |
| Media Bias | .159 | .164 | .143 | .152 |
|  | (.061)** | (.062)** | (.063)** | (.063)** |
| Corruption | .993 | .961 | .987 | .999 |
|  | (.406)** | (.411)** | (.375)** | (.38)** |
| Region Dummies | Y | Y | Y | Y |
|  |  |  |  |  |
| Year Dummies | Y | Y | Y | Y |
|  |  |  |  |  |
| Constant | -.594 | -.174 | .729 | .068 |
|  | (1.156) | (1.161) | (1.334) | (1.111) |
| R-sq | .889 | .892 | .902 | .897 |
| N |  |  |  |  |
| (elections) | 109 | 109 | 109 | 109 |
| (countries) | 50 | 50 | 50 | 50 |

*Notes*: Robust standard errors, clustered by country in parentheses. Positive coefficients indicate more voting irregularities. *p<0.1, **p<0.05, ***p<0.01

**Appendix 9.** Pre-election opinion polls.

| Country | Year | Election (mmdd) | Poll Source | mmdd | Poll Sample | Poll Proximity (days) | FH Status |
| --- | --- | --- | --- | --- | --- | --- | --- |
| Argentina | 1999 | 1024 | Latinobarometro | 1130 | 1200 | 328 | F |
| Argentina | 2003 | 427 | Latinobarometro | 531 | 1200 | 331 | F |
| Argentina | 2007 | 1028 | Latinobarometro | 930 | 1200 | 28 | F |
| Argentina | 2011 | 1023 | Latinobarometro | 831 | 1200 | 53 | F |
| Argentina | 2015 | 1025 | Latinobarometro | 131 | 1200 | 267 | F |
| Benin | 2006 | 305 | Afrobarometer |  | 1198 |  | F |
| Bolivia | 1997 | 601 | Latinobarometro | 630 | 772 | 336 | F |
| Bolivia | 2002 | 630 | Latinobarometro | 531 | 1242 | 30 | F |
| Bolivia | 2014 | 1012 | Ipsos | 801 |  | 71 | PF |
| Brazil | 2010 | 1003 | Vox Populi | 903 |  | 30 | F |
| Brazil | 2014 | 1005 | Datafolha | 901 |  | 34 | F |
| Bulgaria | 2011 | 1023 | Alpha Rissourch | 920 |  | 33 | F |
| Bulgaria | 2016 | 1106 | Market Links | 1004 |  | 33 | F |
| Chile | 2005 | 1211 | Latinobarometro | 831 | 1200 | 102 | F |
| Chile | 2009 | 1213 | El Mercurio-Opina | 1107 |  | 36 | F |
| Chile | 2013 | 1117 | Ipsos | 1008 |  | 40 | F |
| Colombia | 1998 | 531 | Latinobarometro | 1231 | 1200 | 151 | PF |
| Colombia | 2002 | 526 | Napoleon Franco | 418 |  | 38 | PF |
| Colombia | 2010 | 530 | Ipsos | 327 |  | 64 | PF |
| Costa Rica | 1998 | 201 | Latinobarometro | 1231 | 1007 | 32 | F |
| Costa Rica | 2002 | 203 | Latinobarometro | 430 | 1000 | 279 | F |
| Costa Rica | 2006 | 205 | Latinobarometro | 831 | 1000 | 158 | F |
| Costa Rica | 2010 | 207 | CID Gallup | 124 |  | 14 | F |
| Costa Rica | 2014 | 202 | CID Gallup | 114 |  | 19 | F |
| Croatia | 2009 | 1227 | Totus Opiniometar | 1125 |  | 32 | F |
| Croatia | 2014 | 1228 | Ipsos Puls | 904 |  | 115 | F |
| Cyprus | 2008 | 217 | Noverna | 117 |  | 31 | F |
| Cyprus | 2013 | 217 | Evresis | 1222 |  | 67 | F |
| Dominican Republic | 2008 | 516 | Latinobarometro | 930 | 1000 | 228 | F |
| Dominican Republic | 2012 | 520 | Latinobarometro | 831 | 1000 | 300 | F |
| Ecuador | 2009 | 426 | CEDATOS | 315 |  | 42 | PF |
| Ecuador | 2013 | 217 | Opinion Publica | 110 |  | 38 | PF |
| El Salvador | 1999 | 307 |  |  | 1000 | 233 | F |
| El Salvador | 2004 | 321 | Latinobarometro | 731 | 1008 | 166 | F |
| El Salvador | 2009 | 315 | Latinobarometro | 930 | 1000 | 20 | F |
| El Salvador | 2014 | 202 | Mitofsky | 113 |  | 43 | F |
| Finland | 2006 | 115 | Suomen Gallup | 1209 |  | 37 | F |
| Finland | 2012 | 122 | TNS Gallup | 103 |  | 19 | F |
| France | 2002 | 421 | Ipsos | 322 |  | 30 | F |
| France | 2007 | 422 | Ipsos | 324 |  | 29 | F |
| France | 2012 | 422 | Ipsos | 323 |  | 30 | F |
| Georgia | 2013 | 1027 | NDI | 818 | 3838 | 70 | PF |
| Ghana | 2012 | 1207 | Afrobarometer |  | 2400 |  | F |
| Ghana | 2016 | 1207 | Ben Ephson | 1128 |  | 9 | F |
| Guatemala | 2003 | 1109 | Latinobarometro | 731 | 1006 | 101 | PF |
| Guatemala | 2007 | 909 | El Periodico | 601 |  | 100 | PF |
| Guatemala | 2011 | 911 | Latinobarometro | 930 | 1000 | 346 | PF |
| Guatemala | 2015 | 906 | Siglo 21 | 803 |  | 34 | PF |
| Haiti | 2006 | 207 | CID Gallup | 1101 | 1200 | 105 | PF |
| Haiti | 2010 | 1128 | BRIDES | 1002 |  | 57 | PF |
| Honduras | 2005 | 1127 | Latinobarometro | 831 | 1000 | 88 | PF |
| Honduras | 2009 | 1129 | CID Gallup | 1013 | 1420 | 47 | PF |
| Honduras | 2013 | 1124 | CID Gallup | 1009 | 1525 | 46 | PF |
| Indonesia | 2014 | 709 | Indonesia Network Election Survey | 201 |  | 158 | PF |
| Kenya | 2007 | 1227 | Gallup | 1101 |  | 56 | PF |
| Kenya | 2013 | 304 | Ipsos Synovate | 131 | 2365 | 32 | PF |
| Lithuania | 2014 | 511 | Spinter Tyrimai | 407 |  | 34 | F |
| Madagascar | 2013 | 1220 | Afrobarometer |  | 1200 |  | PF |
| Malawi | 2014 | 520 | Afrobarometer | 401 | 2400 | 49 | PF |
| Mali | 2013 | 811 | Afrobarometer |  | 1200 |  | PF |
| Mexico | 2006 | 702 | Latinobarometro | 831 | 1200 | 305 | F |
| Mexico | 2012 | 701 | Ipsos | 201 |  | 150 | PF |
| Moldova | 2016 | 1030 | ASDM | 928 | 1161 | 32 | PF |
| Nicaragua | 1996 | 1020 | Latinobarometro | 630 | 1034 | 112 | PF |
| Nicaragua | 2001 | 1104 | Latinobarometro | 430 | 1005 | 156 | PF |
| Nicaragua | 2006 | 1105 | CID Gallup | 1001 | 5090 | 35 | PF |
| Nicaragua | 2011 | 1106 | CID Gallup | 1001 |  | 36 | PF |
| Panama | 1999 | 502 | Latinobarometro | 1130 | 1000 | 153 | F |
| Panama | 2004 | 502 | Latinobarometro | 731 | 1004 | 275 | F |
| Panama | 2009 | 503 | Latinobarometro | 930 | 1000 | 215 | F |
| Panama | 2014 | 504 | Ipsos | 423 |  | 11 | F |
| Paraguay | 2013 | 421 | Grau | 315 |  | 37 | PF |
| Philippines | 2004 | 510 | Pulse Asia | 327 | 4800 | 44 | F |
| Philippines | 2010 | 510 | Pulse Asia | 423 | 1800 | 17 | PF |
| Philippines | 2016 | 509 | Pulse Asia | 416 | 1800 | 23 | PF |
| Poland | 2010 | 620 | TNS OBOP | 514 |  | 37 | F |
| Poland | 2015 | 510 | Millward Brown | 413 |  | 27 | F |
| Portugal | 2006 | 122 | Eurosondagem | 1211 | 2069 | 42 | F |
| Portugal | 2011 | 123 | Eurosondagem | 1223 |  | 31 | F |
| Romania | 2009 | 1122 | Gallup Romania | 1101 |  | 21 | F |
| Romania | 2014 | 1102 | INSCOP | 1002 |  | 31 | F |
| Russia | 1996 | 616 | CESSI | 509 |  | 38 | PF |
| Serbia | 2008 | 120 | Factor Plus | 1212 |  | 39 | F |
| Sierra Leone | 2012 | 1117 | Afrobarometer |  | 1190 |  | PF |
| Slovakia | 2004 | 403 | OMV | 309 |  | 25 | F |
| Slovakia | 2014 | 315 | Polis | 301 |  | 14 | F |
| Slovenia | 2012 | 1111 | Delo | 1008 | 700 | 34 | F |
| South Korea | 2012 | 1219 | JoongAng Ilbo | 719 | 2000 | 153 | F |
| Taiwan | 2008 | 322 | TVBS | 224 |  | 26 | F |
| Taiwan | 2012 | 114 | TVBS | 1217 |  | 28 | F |
| Taiwan | 2016 | 116 | TVBS | 1213 |  | 34 | F |
| Tanzania | 2015 | 1025 | Ipsos | 905 | 1836 | 50 | PF |
| Tunisia | 2014 | 1123 | Sigma | 701 |  | 145 | F |
| Ukraine | 2010 | 117 | SOCIS | 908 | 2040 | 131 | PF |
| Ukraine | 2014 | 525 | International Republican Institute | 314 |  | 72 | PF |
| United States | 2008 | 1104 | Gallup | 1003 |  | 32 | F |
| United States | 2012 | 1106 | Gallup | 925 | 3050 | 42 | F |
| United States | 2016 | 1108 | IPSOS/Reuters | 1004 | 2363 | 35 | F |
| Uruguay | 2014 | 1026 | Cifra | 219 | 1000 | 249 | F |
| Venezuela | 1998 | 1206 | Latinobarometro | 1231 | 1200 | 340 | F |
| Venezuela | 2000 | 730 | Latinobarometro |  | 1200 |  | PF |
| Venezuela | 2006 | 1203 | Keller y Asociados | 1102 |  | 31 | PF |
| Venezuela | 2012 | 1007 | IVAD | 902 |  | 35 | PF |
| Venezuela | 2013 | 414 | Datamatica | 301 |  | 44 | PF |
| Zambia | 2006 | 928 | Afrobarometer |  | 1200 |  | PF |
| Zambia | 2008 | 1030 | Steadman |  |  |  | PF |
| Zambia | 2015 | 120 | Afrobarometer |  | 1199 |  | PF |
